# Supplementary material for: Electroacupuncture reprograms microglia to drive BDNF-dependent hippocampal neurogenesis and antidepressant responses in chronic stress model
Source: Research Square preprint supplement (doi:10.21203/rs.3.rs-7545312/v1), 2025-09-26
Supplement: Supplementary file 1 [file 06948f99a9a155ac26faa2dc.docx]

**Methods**

**Table S2**

| REAGENT or RESOURCE | SOURCE | IDENTIFIER |
| --- | --- | --- |
| Immunofluorescence Antibody |  |  |
| Goat polyclonal anti-Iba1 | Wako | Cat#019-19741 |
| Rabbit monoclonal anti-CD68 | HUABIO | Cat# PSH05-47 |
| Rabbit monoclonal anti-DCX | Cell Signaling Technology | Cat#91068S |
| Rabbit monoclonal antibody-SOX2 | HUABIO | Cat# HA721155 |
| Rabbit monoclonal antibody-NeuN | HUABIO | Cat# SR45-07 |
| Guinea pig monoclonal anti-DCX | HUABIO | Cat# HA601496 |
| AF488 donkey anti-goat; 1:1,000 | Jackson Immuno | Cat#: 705-545-003 |
| AF568 donkey anti-goat; 1:1,000 | Thermo Fisher | Cat#: A11057 |
| AF568 donkey anti-rabbit; 1:1,000 | Thermo Fisher | Cat#: A10042 |
| AF488 donkey anti-rabbit; 1:1,000 | Jackson Immuno | Cat#: 711-545-152 |
| AF568 donkey anti-Guinea pig; 1:1,000 | HUABIO | Cat#: D-GP488 |
| WB antibody |  |  |
| CREB-1 (PT0516R) PT™ Rabbit mAb | Immunoway | Cat#YM8342 |
| β-actin Rabbit mAb | Cell Signaling Technology | Cat#4967 |
| Doublecortin (PT0871R) PT™ Rabbit mAb | Immunoway | Cat#YM8640 |
| MECP2 (PT0726R) PT™ Rabbit mAb | Immunoway | Cat#YM8090 |
| BDNF (PT0858R) PT™ Rabbit mAb | Immunoway | Cat#YM8627 |
| Trk B Rabbit pAb | Immunoway | Cat#YT4743 |
| Trk B (Phospho Tyr706) Rabbit pAb | Immunoway | Cat#YP0270 |
| PKAα/β Rabbit pAb | Immunoway | Cat#YT3748 |
| Goat Anti Rabbit IgG(H+L) (HRP) | Immunoway | Cat#RS0002 |
