# Supplementary material for: Electroacupuncture reprograms microglia to drive BDNF-dependent hippocampal neurogenesis and antidepressant responses in chronic stress model
Source: Research Square preprint supplement (doi:10.21203/rs.3.rs-7545312/v1), 2025-09-26
Supplement: Supplementary file 2 [file 9be9d6505fec12e881111a18.docx]

Supplementary Table 1. PCR primers

| Gene names | primers |
| --- | --- |
| *IL6* | Forward: 5’- GCCTTCTTGGGACTGATGCT-3’  Reverse: 5’- GCCACTCCTTCTGTGACTCC-3’ |
| *TNFα* | Forward: 5'- AGGCACTCCCCCAAAAGATG-3’  Reverse: 5’-TGGTGGTTTGTGAGTGTGAGG-3’ |
| *IL4* | Forward: 5’-TCTCGAATGTACCAGGAGCCATATC-3’  Reverse: 5’-AGCACCTTGGAAGCCCTACAGA-3’ |
| *TGFβ* | Forward: 5’-GACCGCAACAACGCCATCTA-3’  Reverse: 5’-GGCGTATCAGTGGGGGTCAG-3’ |
| *CREB* | Forward: 5'- CATCTGCTCCCACTGTAACCT-3’  Reverse: 5'- CTTCAATCCTTGGCACCCCT-3’ |
| *TRKB* | Forward: 5’- AAGTTTTCCTTGCCGAGTGC-3’  Reverse: 5’- CCTCCACACAGACACCGTAG-3’ |
| *BDNF* | Forward: 5’-GAGCTGAGCGTGTGTGACAG-3’  Reverse: 5’-CGCCAGCCAATTCTCTTTTTGC-3’ |
| *β-actin* | Forward: 5'-CCGTGAAAAGATGACCCAGATC-3’  Reverse: 5'-CACAGCCTGGATGGCTACGT-3’ |
